# Supplementary material
Source: publisher site journal article supplement (https://www.dovepress.com/article/303412)
Supplement: Supplementary file 1 [file get_supplementary_file.php]

**Table. 1** The complete characteristic of primers used in RT-qPCR.

| **Gene** | **Primer Sequence 5'-3'** | **Annealing Temperature [˚C]** | **Accesion No. of sequence** |
| --- | --- | --- | --- |
| *Bcl-2* | **F:**ATCGCCCTGTGGATGACTGAG | 58,8 | NM_000633.2 |
| **R:**CAGCCAGGAGAAATCAAACAGAGG |
| *Bax* | **F:**ACCAAGAAGCTGAGCGAGTGTC | 58,8 | NM_001291428.1 |
| **R:**ACAAAGATGGTCACGGTCTGCC |
| *Bad* | **F:**ACATTCATCAGCAGGGACGG | 63,5 | NM_007522.3 |
| **R:**ATCCCTTCATCCTCCTCGGT |
| *Mmp-9* | **F:**GATGCCAACCTCCTCAACGA | 60 | NM_053056.2 |
| **R:**GGAAGCGGTCCAGGTAGTTC |
| *Runx-2* | **F:**TCCGAAATGCCTCTGCTGTT | 58,8 | NM_001271630.1 |
| **R:**GCCACTTGGGGAGGATTTGT |
| *Coll-1* | **F:**CAGGGTATTGCTGGACAACGTG | 61,4 | NM_007742.4 |
| **R:**GGACCTTGTTTGCCAGGTTCA |
| *Ca-II* | **F:**TCAGGGAGCCCATTACTGTC | 60 | XM_006509945.3 |
| **R:**TCCAAATCACCCAGCCTAAC |
| *Ctsk* | **F:** TAACAGCAAGGTGGATGAAATCT | 60 | NM_011613.3 |
| **R:** CTGTAGGATCGAGAGGGAGGTAT |
| *Gapdh* | **F:**GTCAGTGGTGGACCTGACCT | 58,8 | NM_001289746.1 |
| **R:**CACCACCCTGTTGCTGTAGC |
| *iNOS* | **F:**GACAAGCTGCATGTGACATC | 59 | NM_010927.4 |
| **R:**GCTGGTAGGTTCCTGTTGTT |
| *TNF-α* | **F:**GAACTGGCAGAAGAGGCACT | 59 | NM_013693.3 |
| **R:**AGGGTCTGGGCCATAGAACT |
| *TGF-β* | **F:**GGAGAGCCCTGGATACCAAC | 59 | NM_011577.2 |
| **R:**CAACCCAGGTCCTTCCTAAA |
| *IL-1β* | **F:**AAGCCTCGTGCTGTCGGACC | 59 | NM_008361.4 |
| **R:**TGAGGCCCAAGGCCACAGGT |


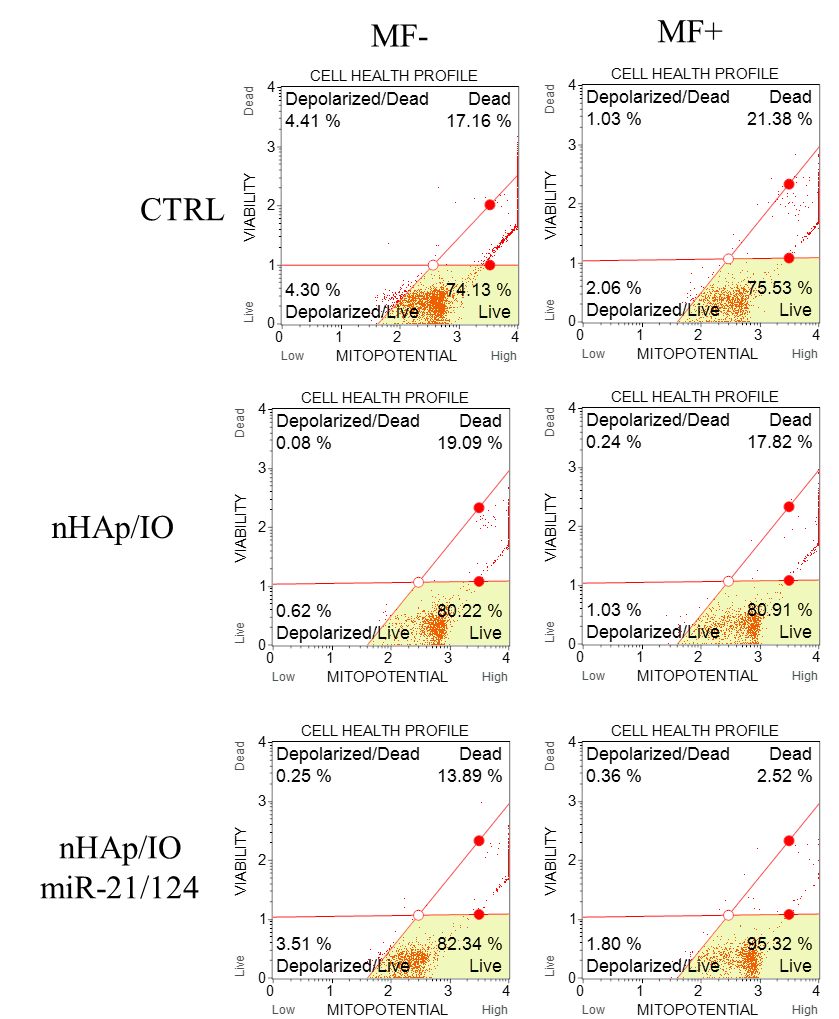


Mitochondrial membrane potential
of MC3T3-E1 pre-osteoblasts

Figure 1S. The representative dot plots, showing the distribution of MC3T3-E1 cells based on mitochondrial membrane potential. The influence of nHAp/IO and nHAp/IO/miR-21/124 on mitochondrial metabolism of pre-osteoblasts cultures monitored without and under magnetic field influence (MF-, MF+, respectively).

Mitochondrial membrane potential
of 4B12 pre-osteoclasts


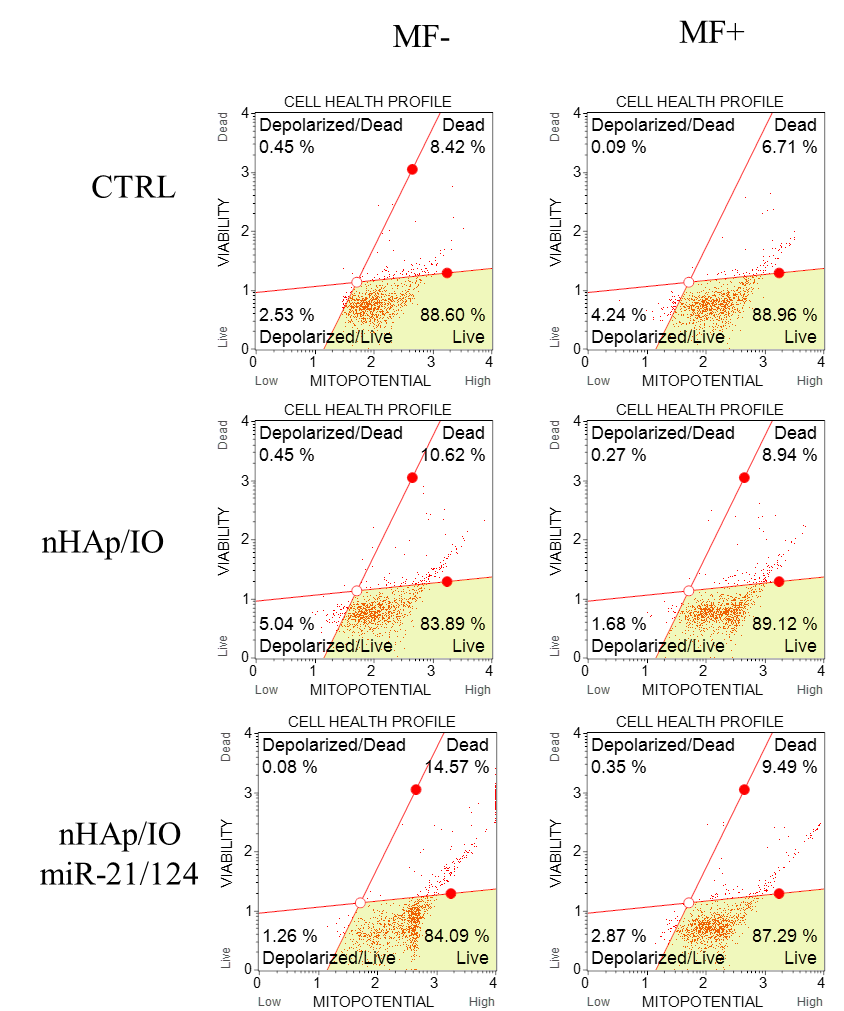


Figure 2S. The representative dot plots, showing the distribution of 4B12 cells based on mitochondrial membrane potential. The influence of nHAp/IO and nHAp/IO/miR-21/124 on mitochondrial metabolism of pre-osteoclasts cultures monitored without and under magnetic field influence (MF-, MF+, respectively).
